# Supplementary material for: Fabrication of a 3D bacterial cellulose intercalated MoS2@rGO nanocomposite for high performance supercapacitors
Source: Royal Society of Chemistry journal article supplement (doi:10.1039/d3nj01567j), 2023-01-01
Supplement: d3nj01567j1.pdf [file d3nj01567j1.pdf]

## Fabrication of 3D bacterial cellulose intercalated MoS<sub>2</sub>@rGO nanocomposite for high performance supercapacitor

Jingyang Tian\*, Ruihua Hao, Chundi Yang, Xiangbin Ge, Xueyang Tang, Zhirui Liu, Jingwei Wang, Minghui Cao, Yuanping Jiang and Chong Lin\*

Jiangxi Province Key Laboratory of Polymer Micro/Nano Manufacturing and Devices, School of Chemistry and Materials Science, East China University of Technology, Nanchang, 330013, China

\*Corresponding author: [jytian2012@163.com](mailto:jytian2012@163.com) (J. Tian); [clin2008@163.com](mailto:clin2008@163.com) (C. Lin)

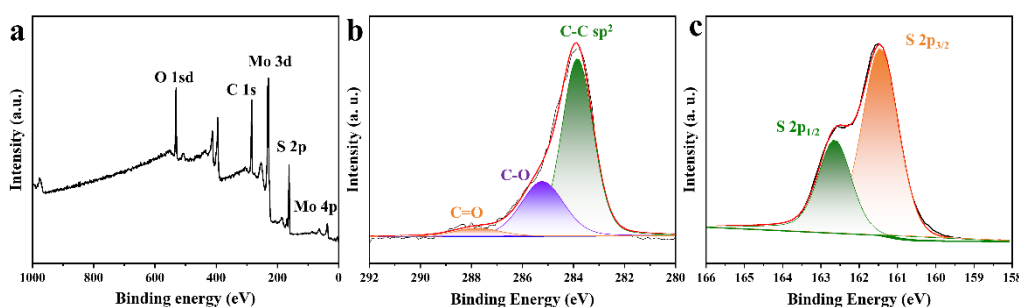

Figure S1. (a) XPS survey spectrum of MoS<sub>2</sub>@rGO@CF-2 and narrow XPS spectrum of (b) C 1s, (c) S 2p.

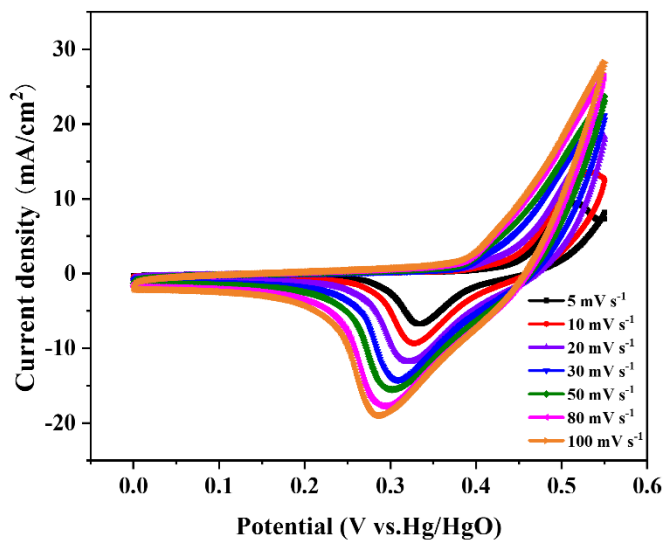

Figure S2. CV curves of MoS<sub>2</sub> at various scan rates.

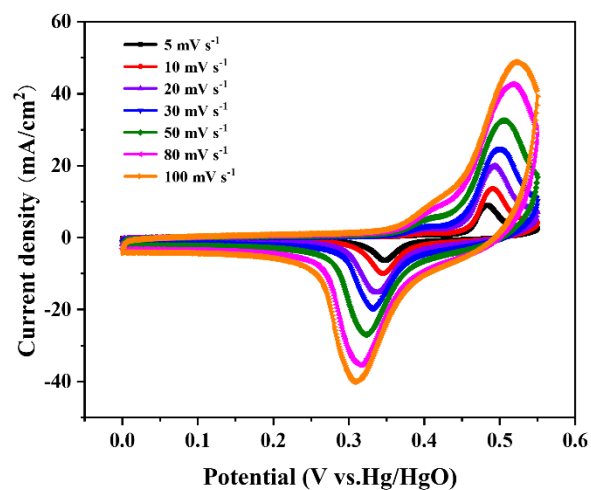

Figure S3. CV curves of MoS<sub>2</sub>@CF at various scan rates.

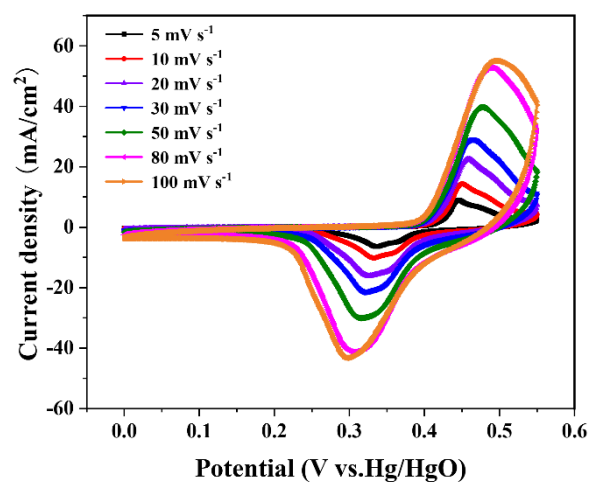

Figure S4. CV curves of MoS<sub>2</sub>@rGO at various scan rates.

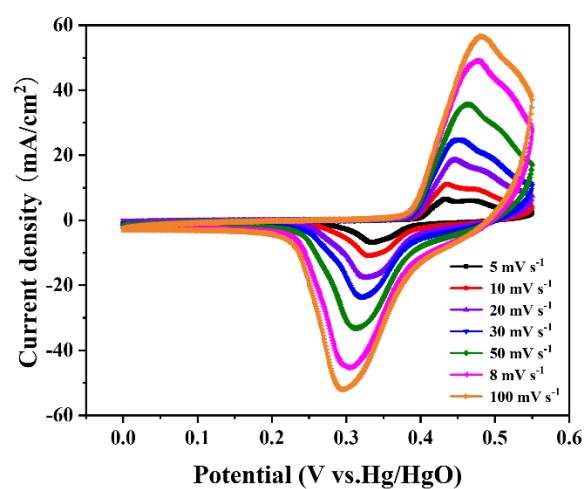

Figure S5. CV curves of MoS<sub>2</sub>@rGO@CF-1 at various scan rates.

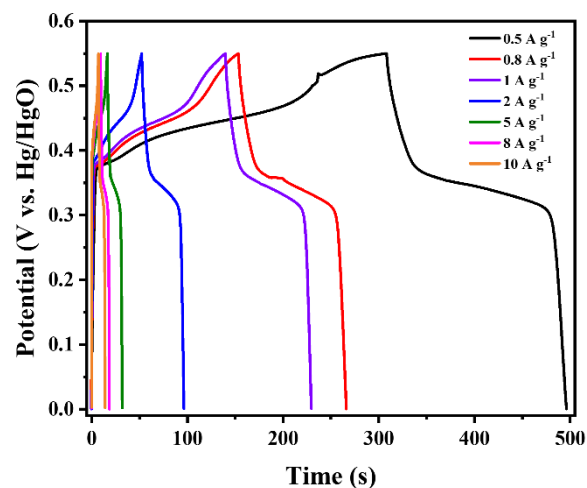

Figure S6. GCD curves of MoS<sub>2</sub> at various current densities.

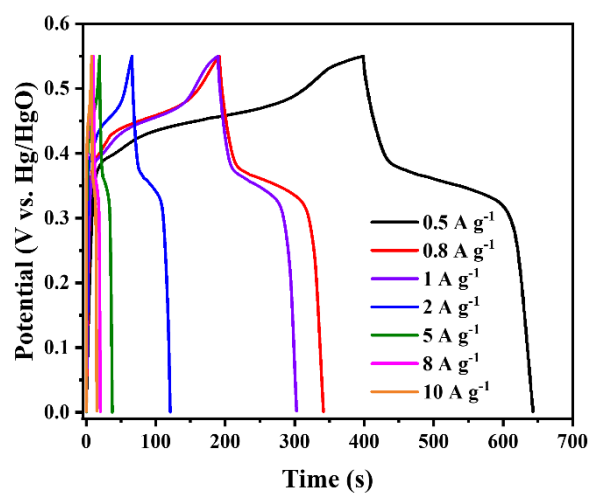

Figure S7. GCD curves of MoS<sub>2</sub>@CF at various current densities.

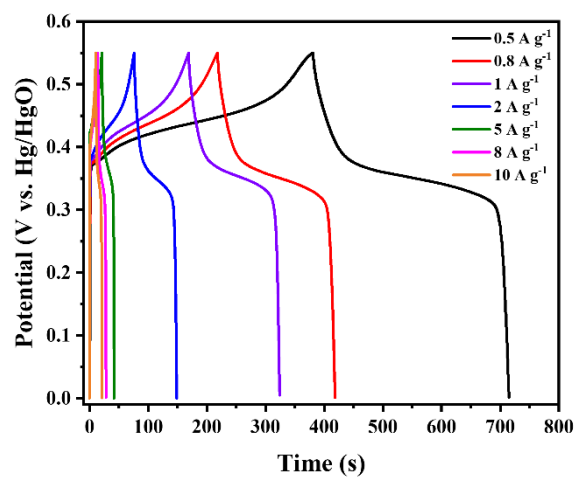

Figure S8. GCD curves of MoS<sub>2</sub>@rGO at various current densities.

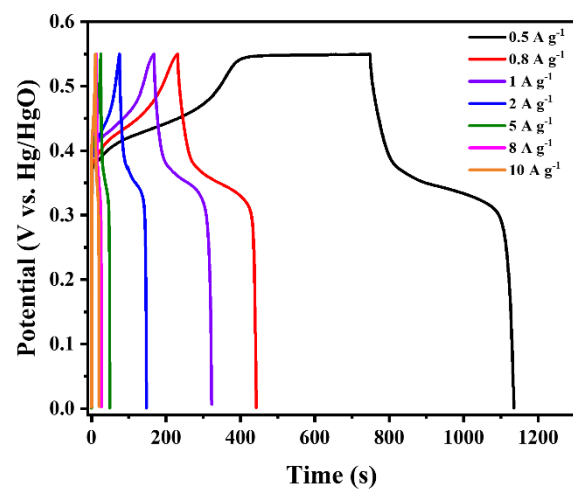

Figure S9. GCD curves of MoS<sub>2</sub>@rGO@CF-1 at various current densities.
